# Supplementary material for: Synthesis and Biological Activity of 3-(Heteroaryl)quinolin-2(1H)-ones Bis-Heterocycles as Potential Inhibitors of the Protein Folding Machinery Hsp90
Source: MDPI journal article supplement (doi:10.3390/molecules27020412), 2022-01-09

## Supporting Information

### Synthesis and Biological Activity of 3-(heteroaryl)quinolin-2(1*H*)-ones bis-Hetereocycles as potential Inhibitors of the Protein Folding Machinery Hsp90

Enrique L. Larghi,<sup>a,b,\*</sup> Alexandre Bruneau,<sup>b</sup> Félix Sauvage,<sup>c</sup> Mouad Alami,<sup>b</sup> Juliette Vergnaud- Gauduchon<sup>c</sup> and Samir Messaoudi<sup>a,\*</sup>

<sup>a</sup> Université Paris-Saclay, CNRS, BioCIS, 92290, Châtenay-Malabry, France;

<sup>b</sup> Instituto de Química Rosario (QUIR) CONICET/UNR, FBioyF, Rosario, S2002LRK, Argentina;

<sup>c</sup> Université Paris-Saclay, CNRS, Institut Galien-Paris Saclay, 92296 Châtenay-Malabry, France.

\* Correspondence: larghi@iquir-conicet.gov.ar;

samir.messaoudi@universite-paris-saclay.fr

#### Table of content

|                                                                               |   |
|-------------------------------------------------------------------------------|---|
| 1. <sup>1</sup> H and <sup>13</sup> C NMR spectra for compounds 4a-h and 5a,b | 2 |
|-------------------------------------------------------------------------------|---|

**4a**,  $^1\text{H}$  NMR,  $\text{CDCl}_3$ , 300 MHz

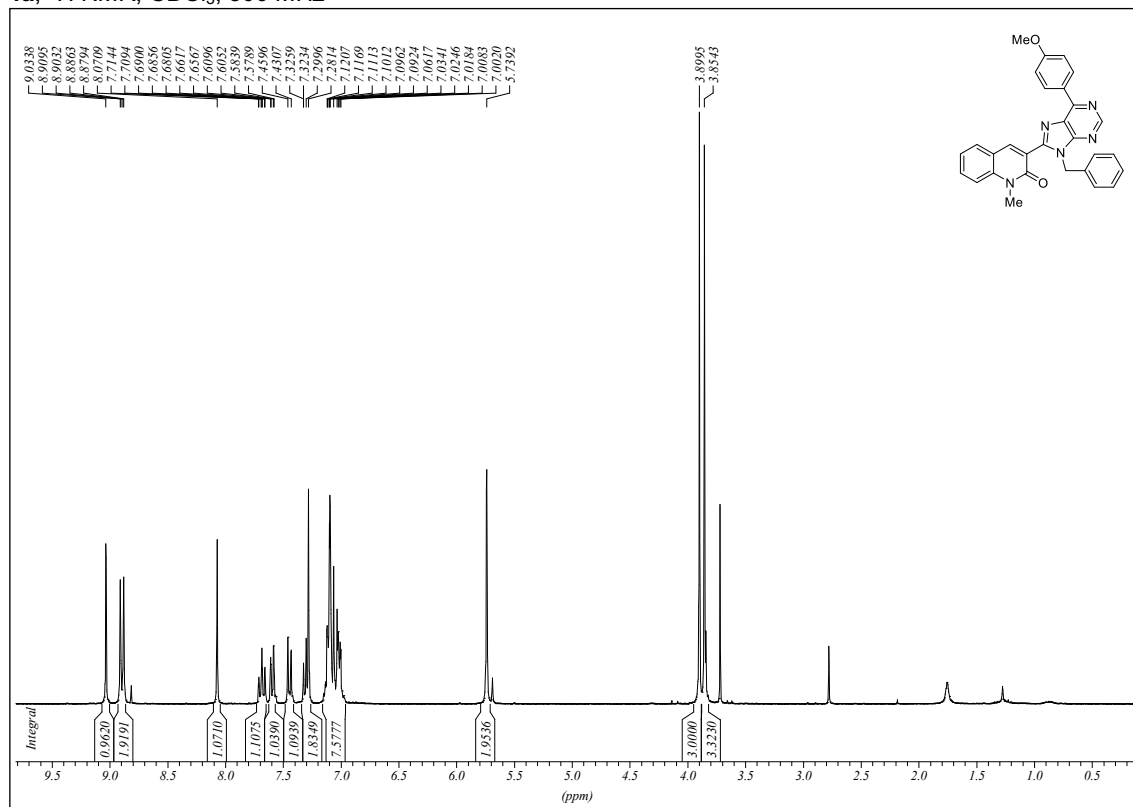

**4a**,  $^{13}\text{C}$  NMR,  $\text{CDCl}_3$ , 75 MHz

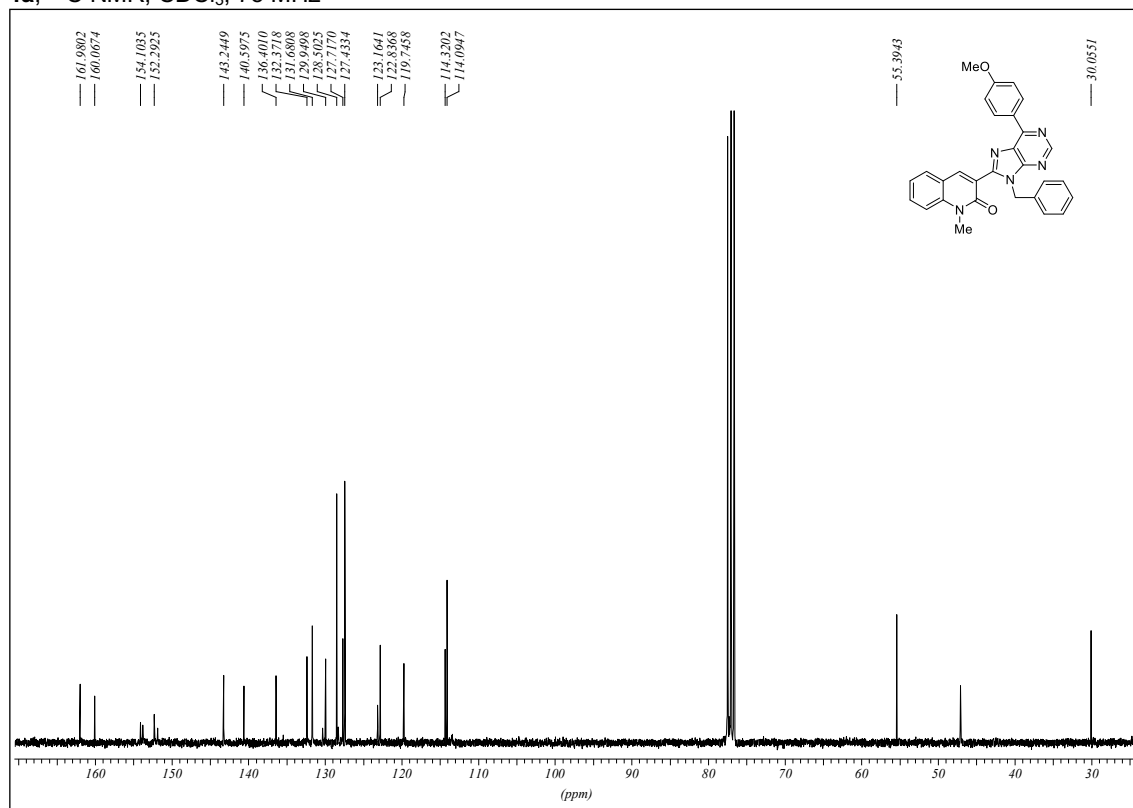

# 4a, HRMS

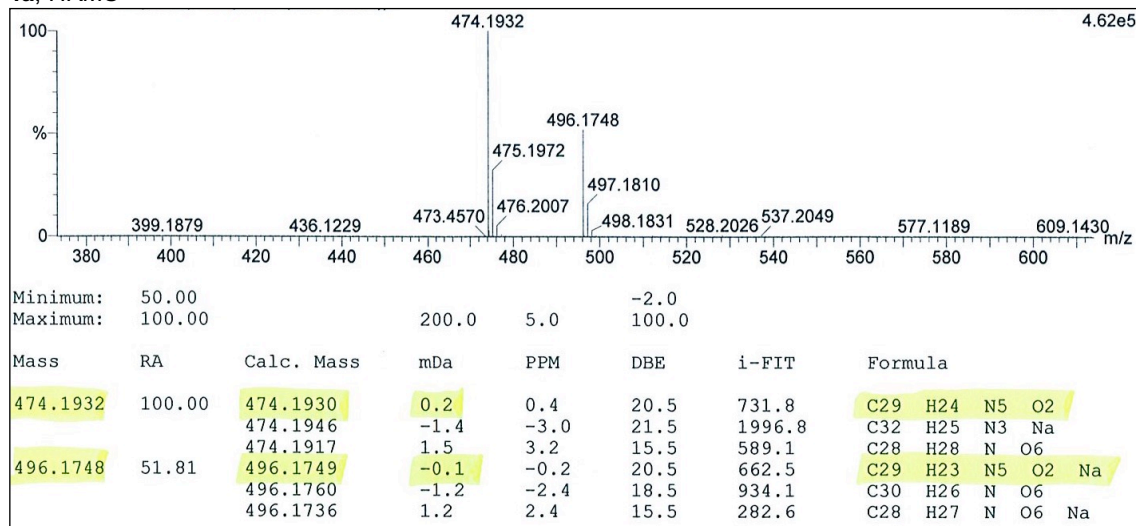

**4b**,  $^1\text{H}$  NMR,  $d_6$ -acetone, 300 MHz

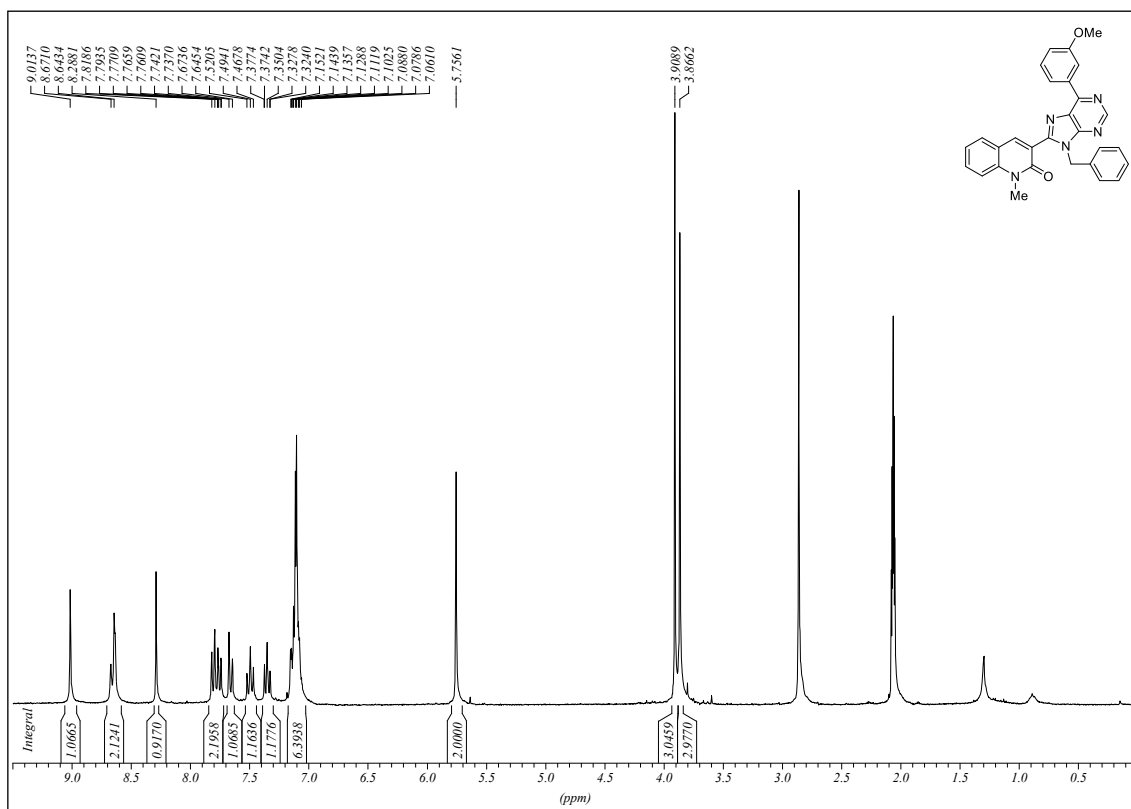

**4b**, JMOD,  $d_6$ -acetone, 75 MHz

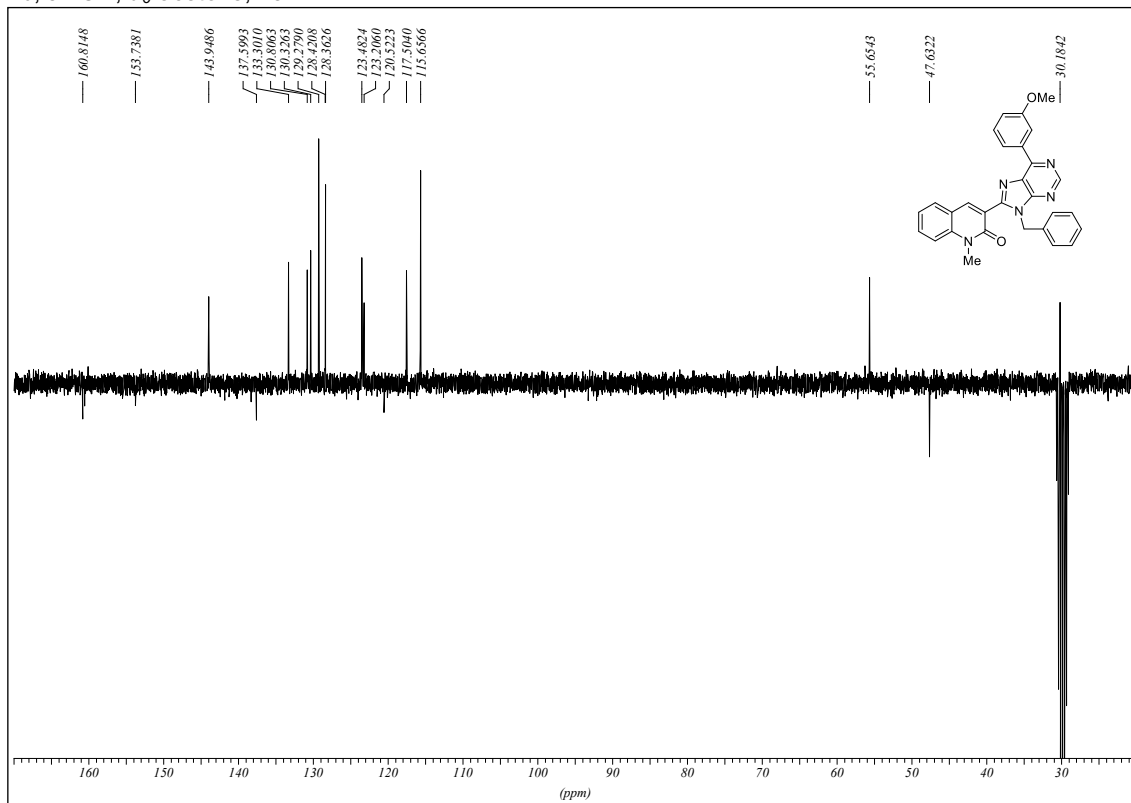

# 4b - HRMS

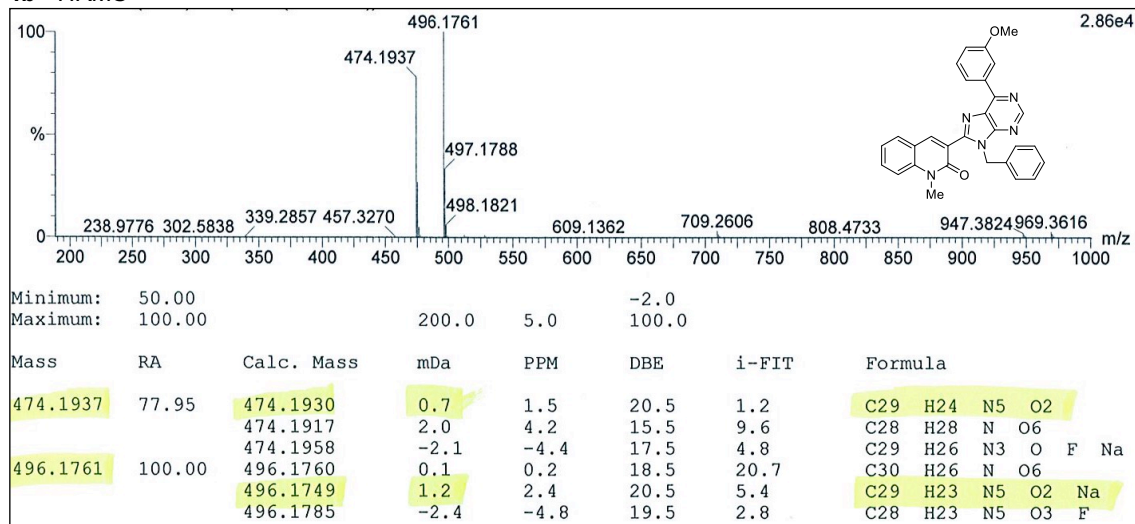

**4c**,  $^1\text{H}$  NMR,  $\text{CDCl}_3$ , 300 MHz

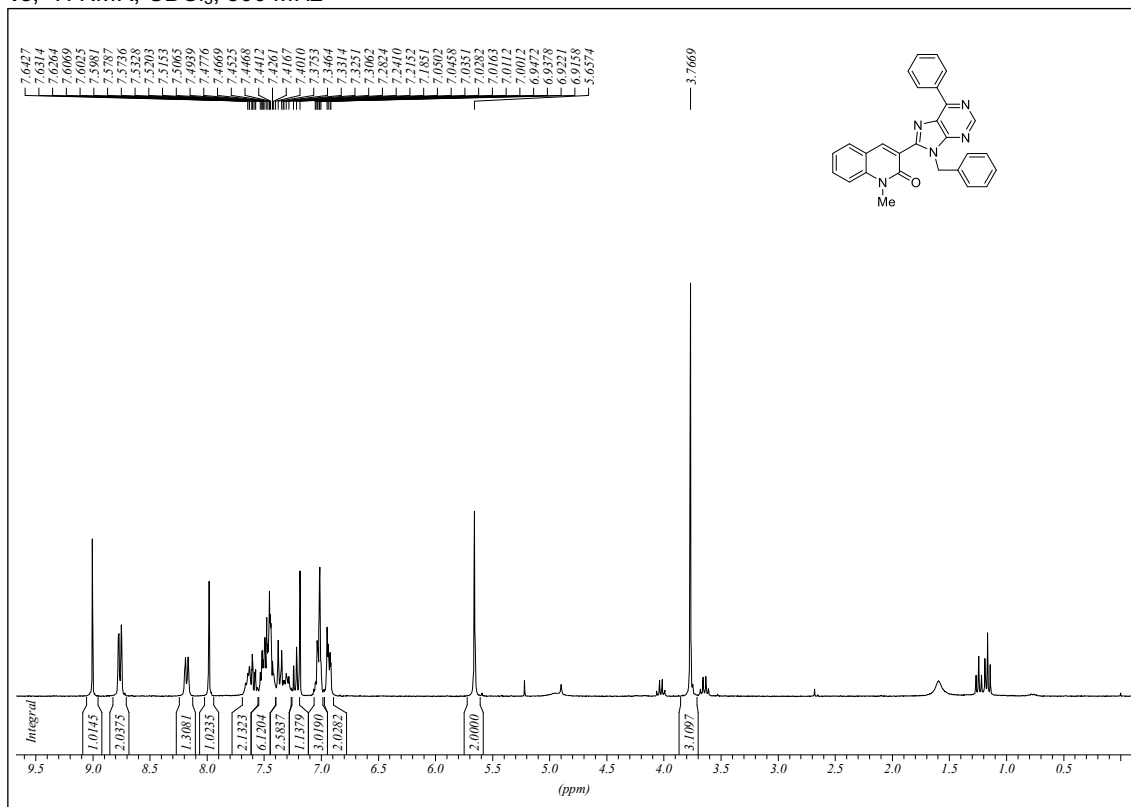

**4c**, JMOD-NMR,  $\text{CDCl}_3$ , 75 MHz

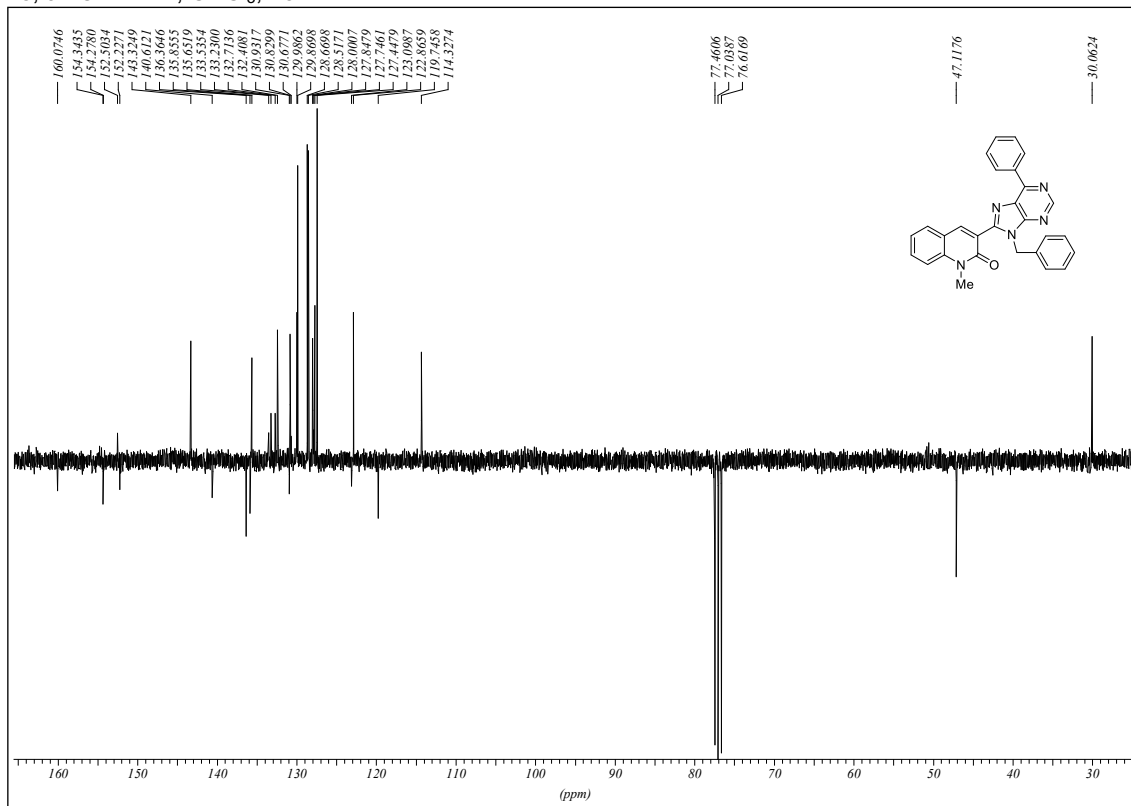

# 4c - HRMS

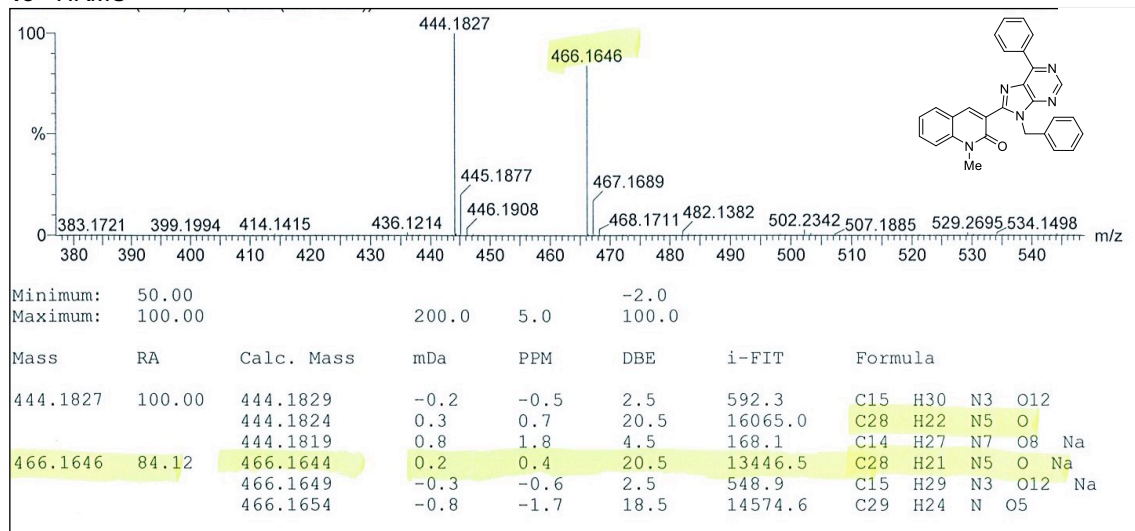

**4d**,  $^1\text{H}$  NMR,  $\text{CDCl}_3$ , 300 MHz

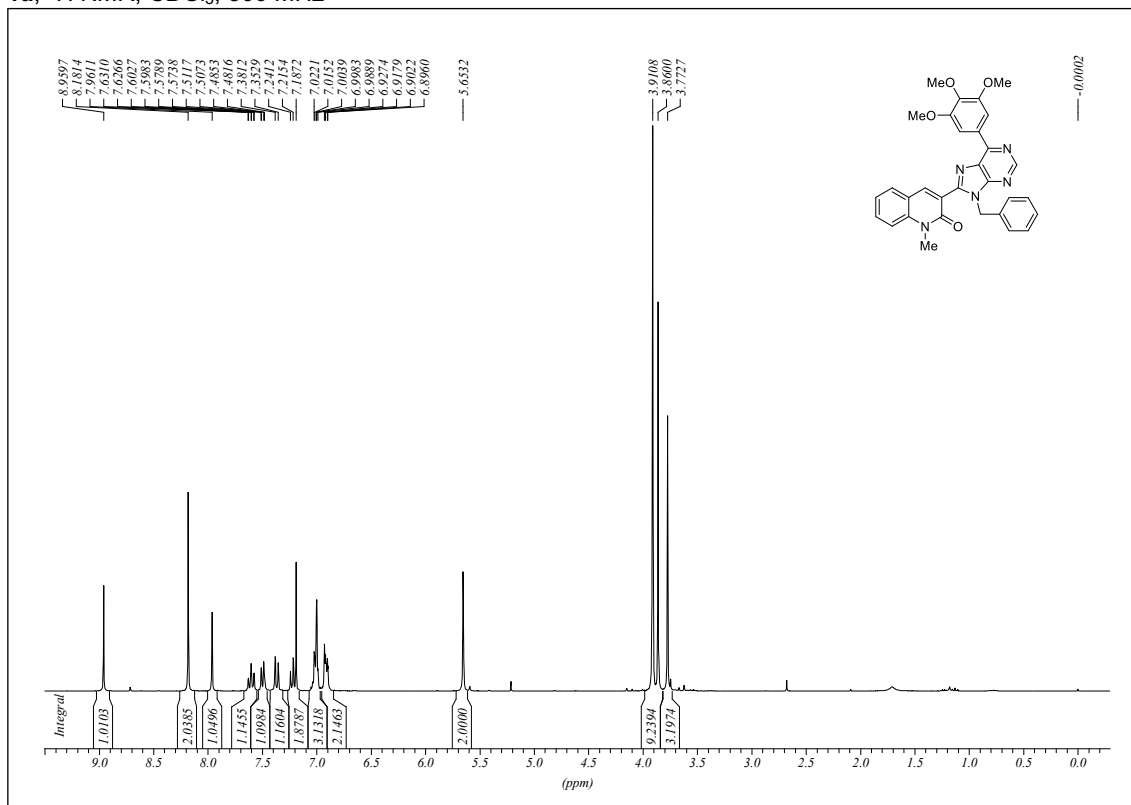

**4d**, JMOD-NMR,  $\text{CDCl}_3$ , 75 MHz

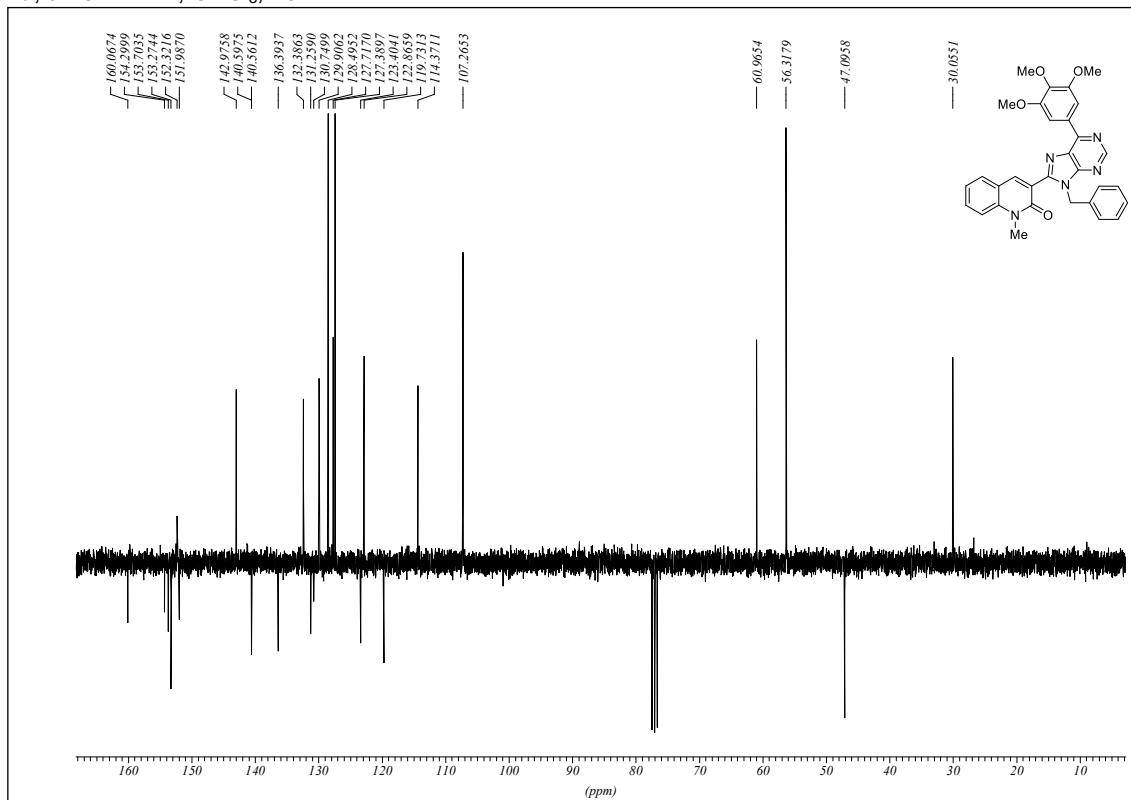



# 4d-HRMS

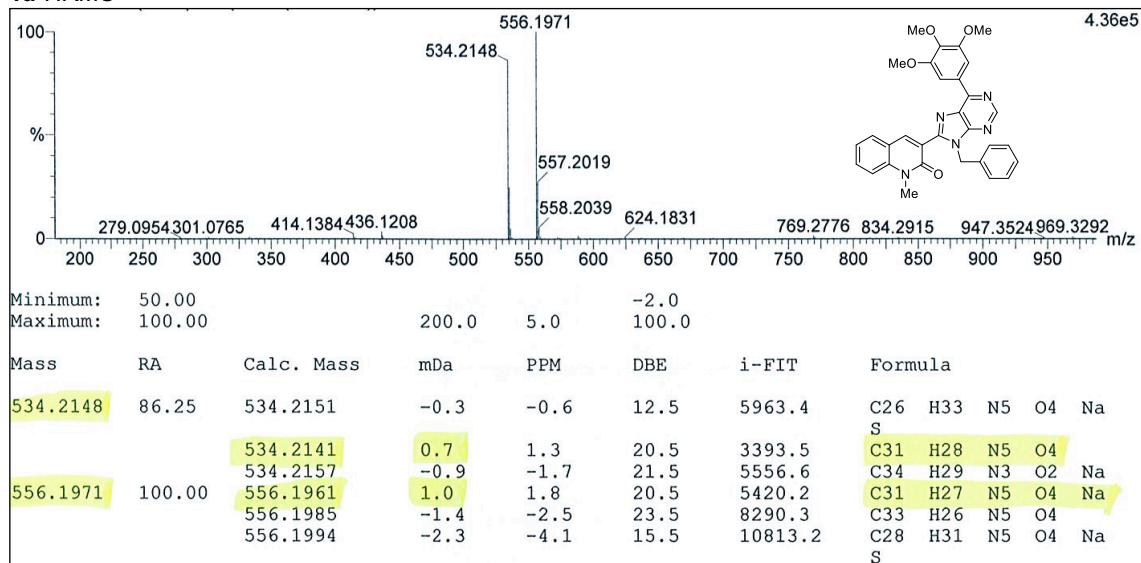

**4e**,  $^1\text{H}$  NMR,  $\text{CDCl}_3$ , 300 MHz

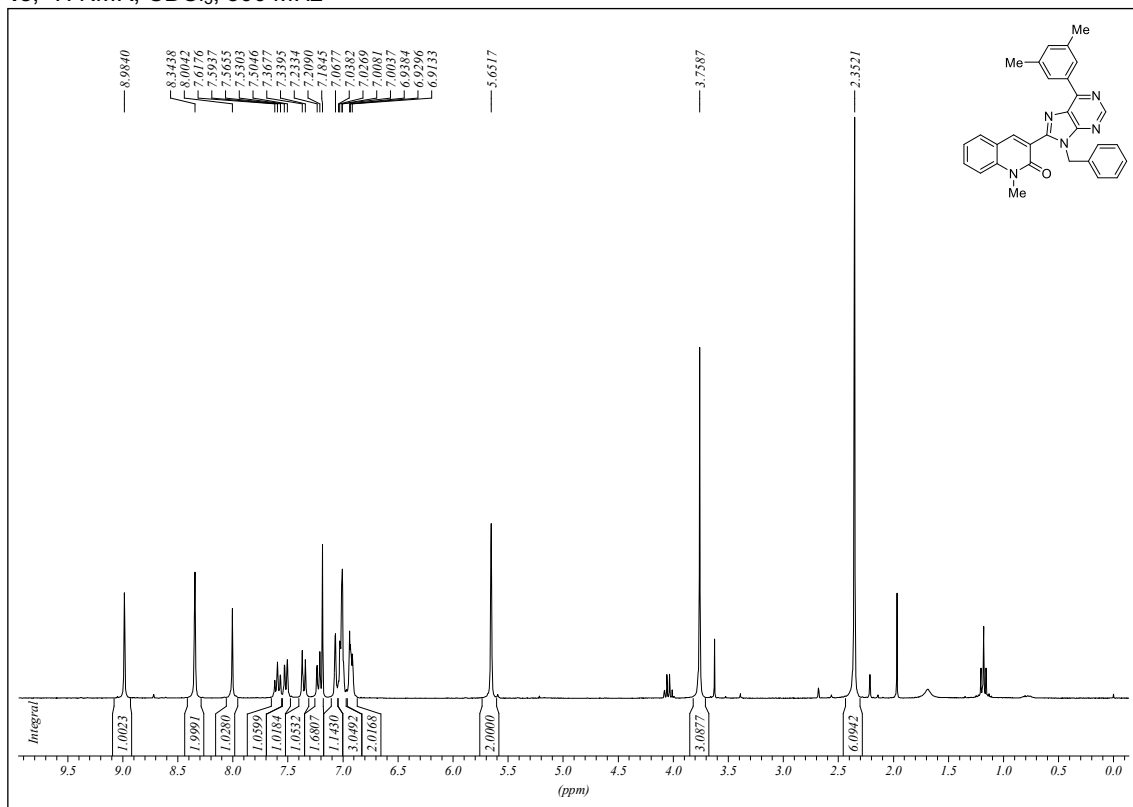

**4e**, JMOD NMR,  $\text{CDCl}_3$ , 75 MHz

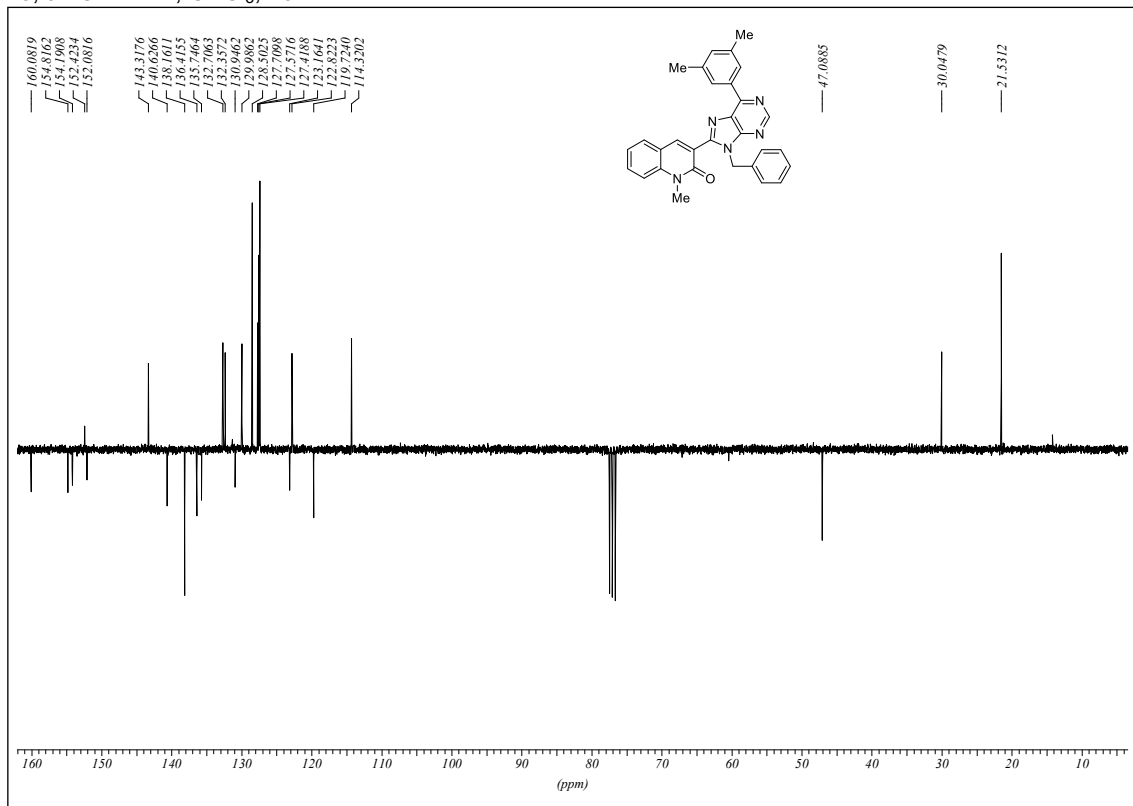

4e-HRMS

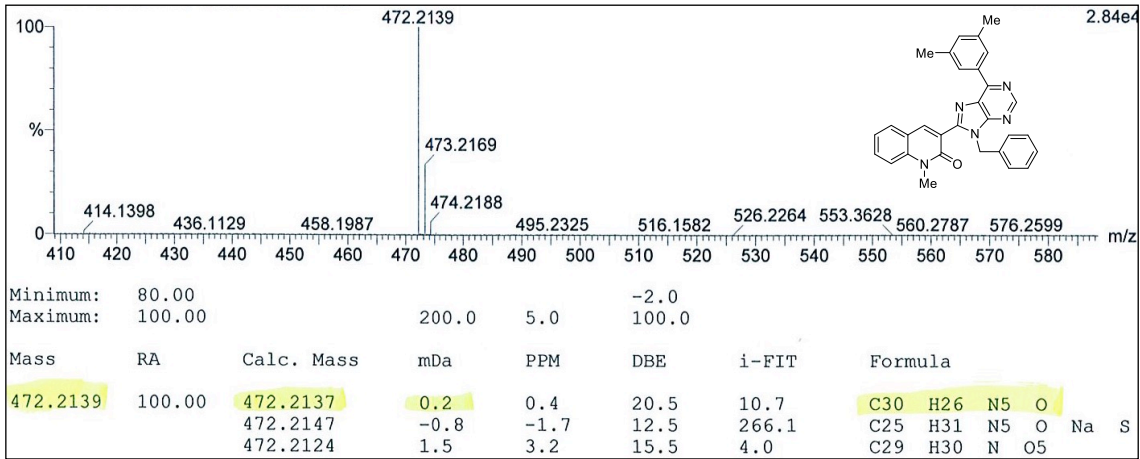

**4f**,  $^1\text{H}$  NMR,  $\text{CDCl}_3$ , 300 MHz

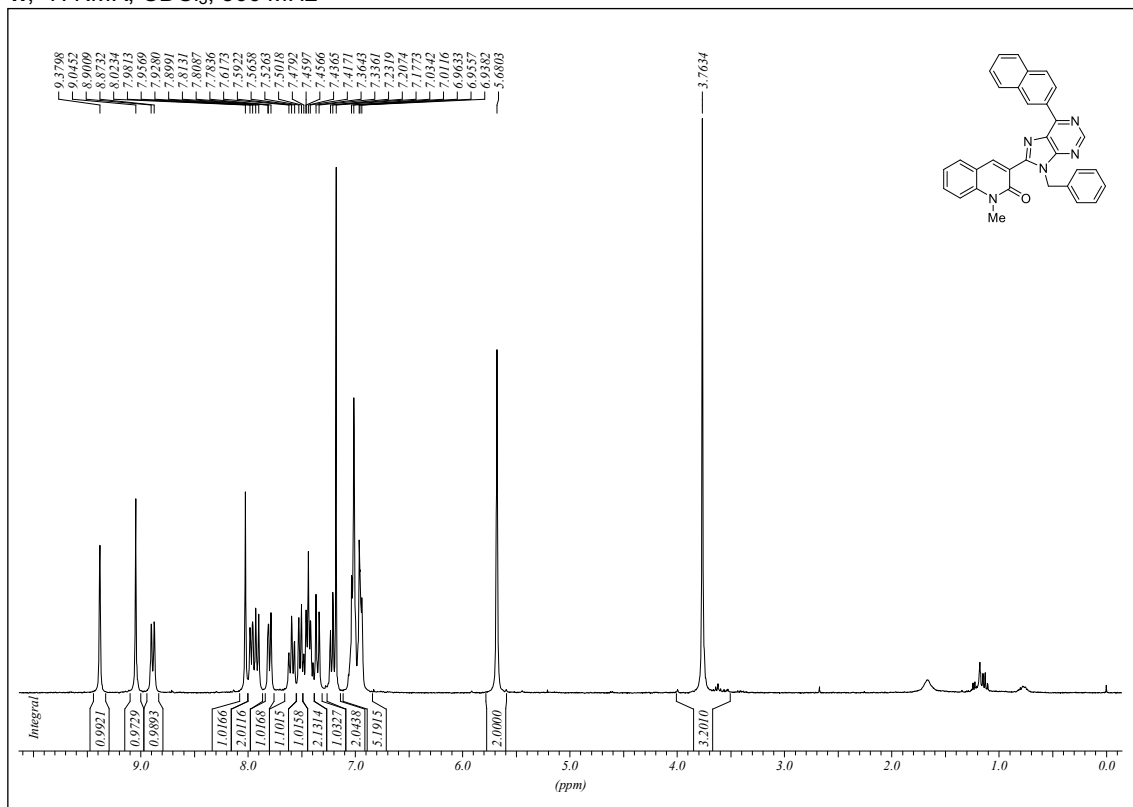

**4f**, JMOD-NMR,  $\text{CDCl}_3$ , 75 MHz

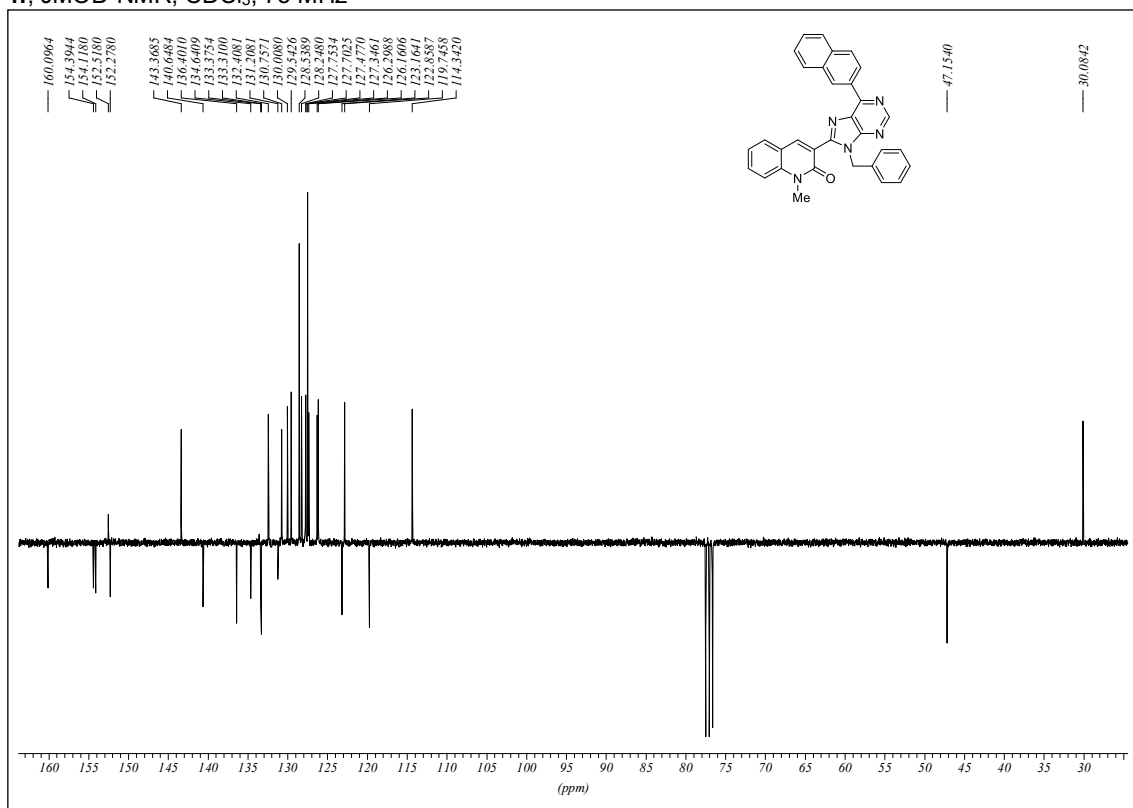

# 4f-HRMS

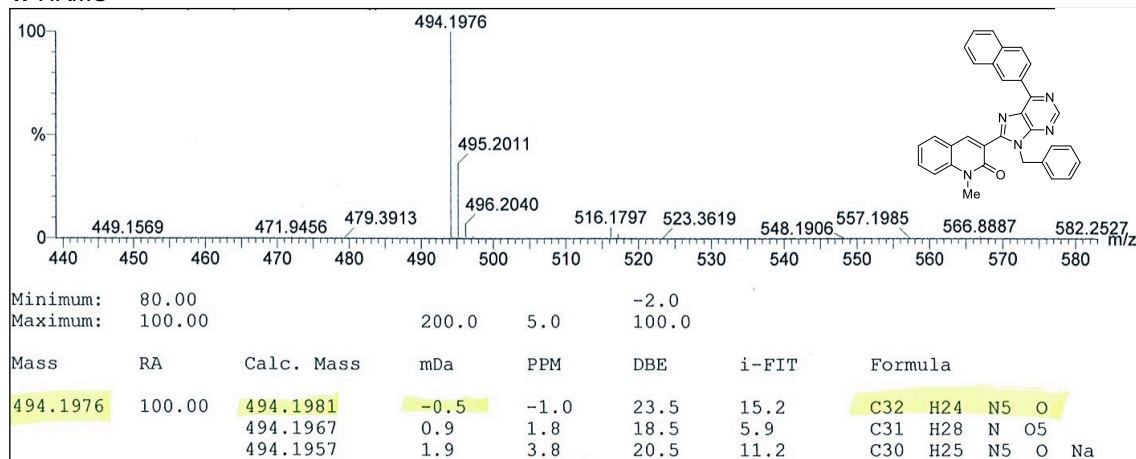

**4g**,  $^1\text{H}$  NMR,  $\text{CDCl}_3$ , 300 MHz

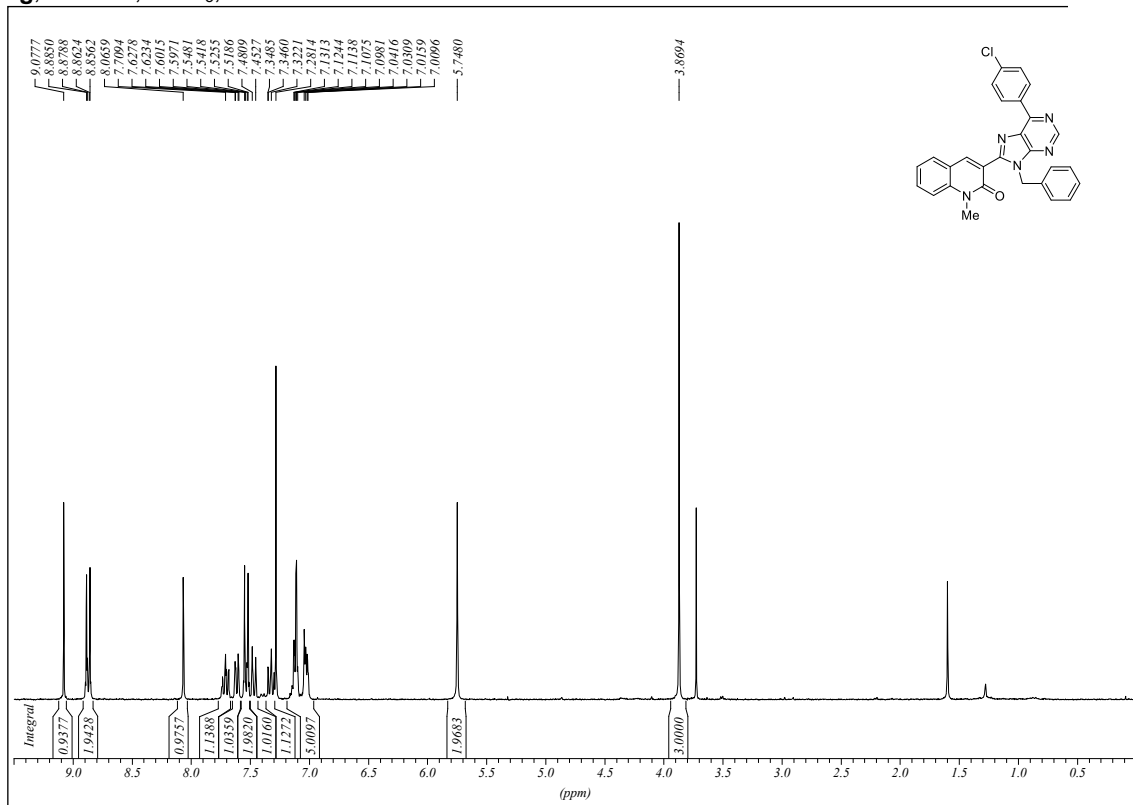

**4g**,  $^{13}\text{C}$  NMR,  $\text{CDCl}_3$ , 75 MHz

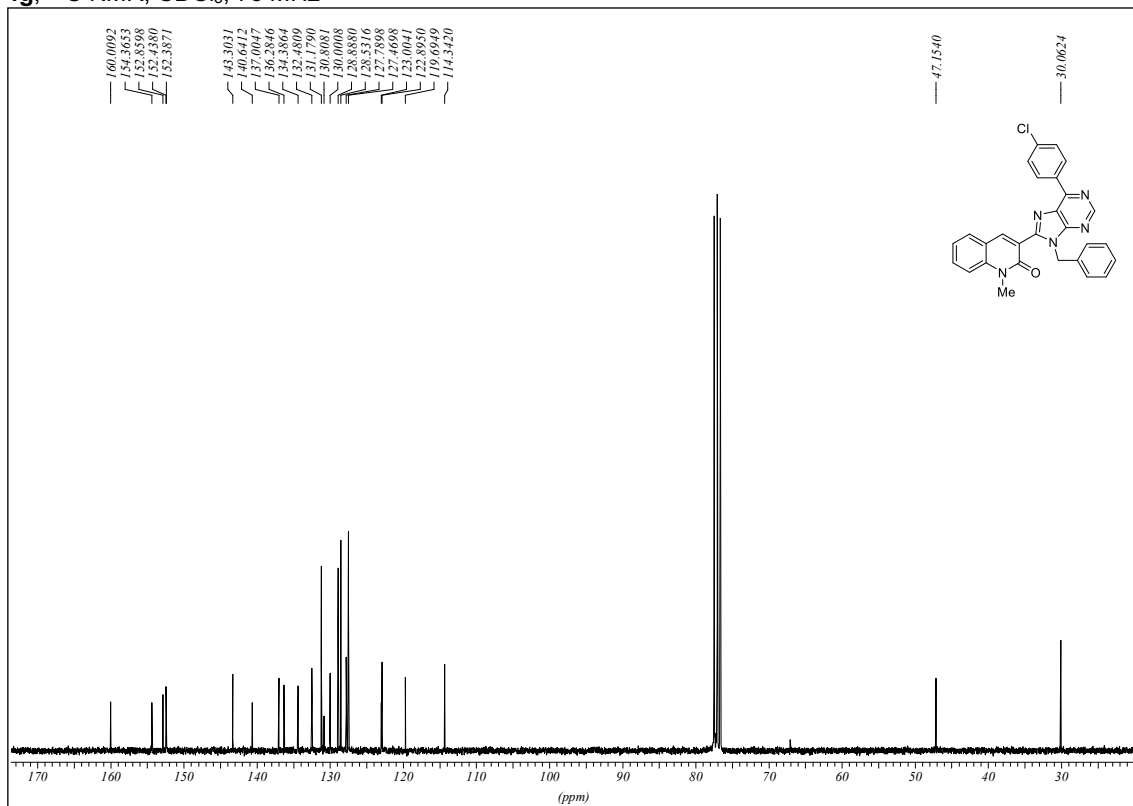

4g, HRMS

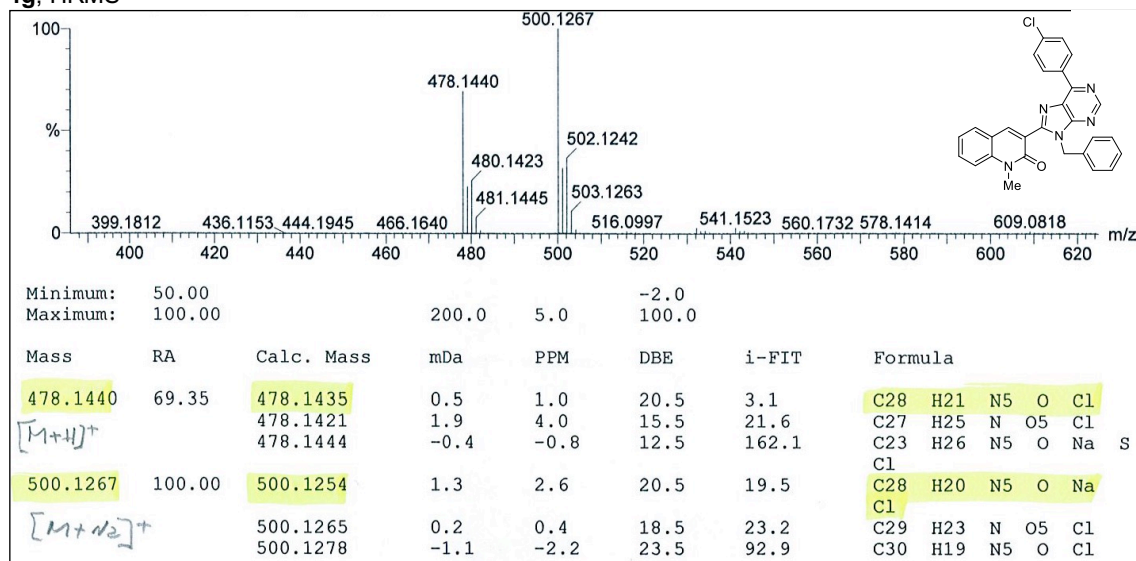

**4h**,  $^1\text{H}$  NMR,  $\text{CDCl}_3$ , 300 MHz

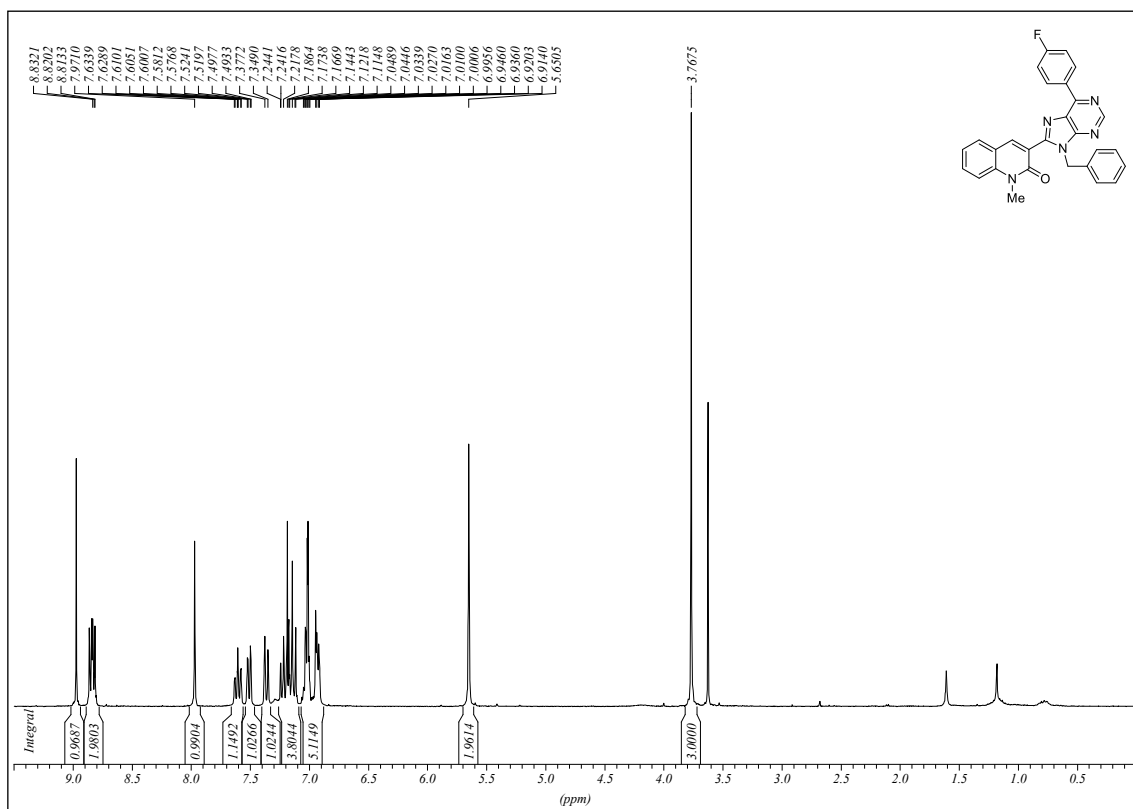

**4h**, JMOD-NMR,  $\text{CDCl}_3$ , 75 MHz

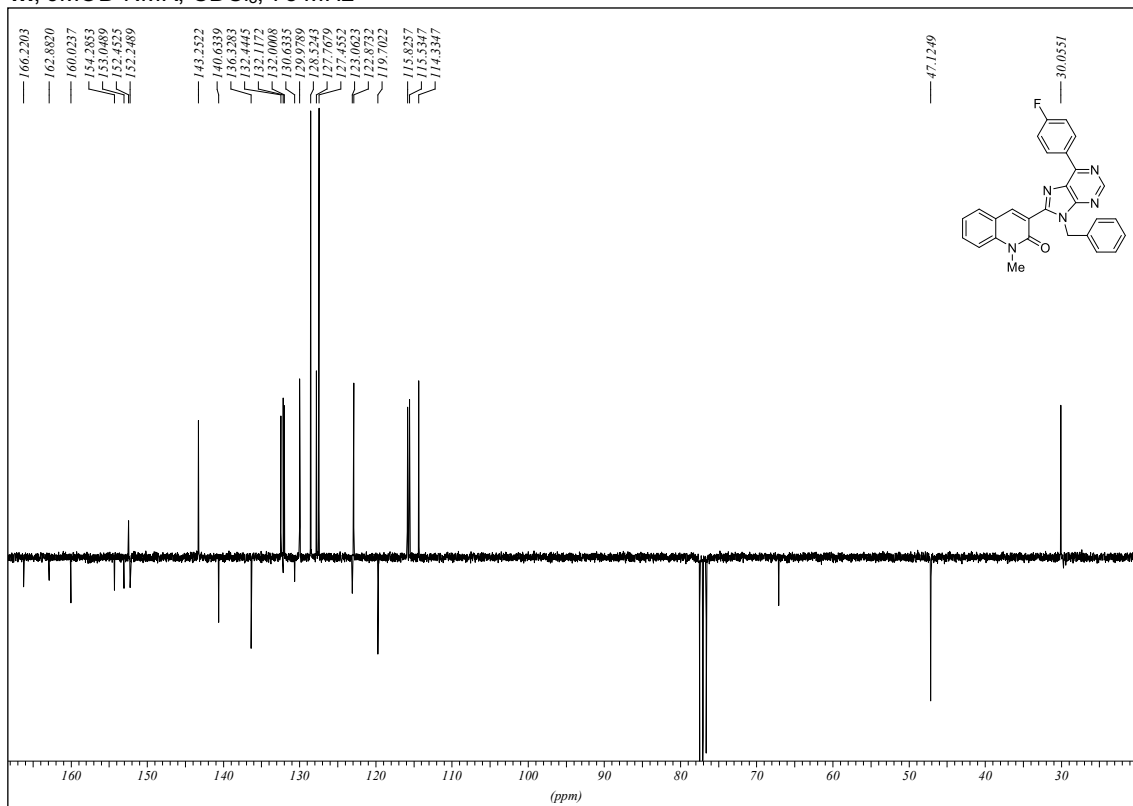



# 4h, HRMS

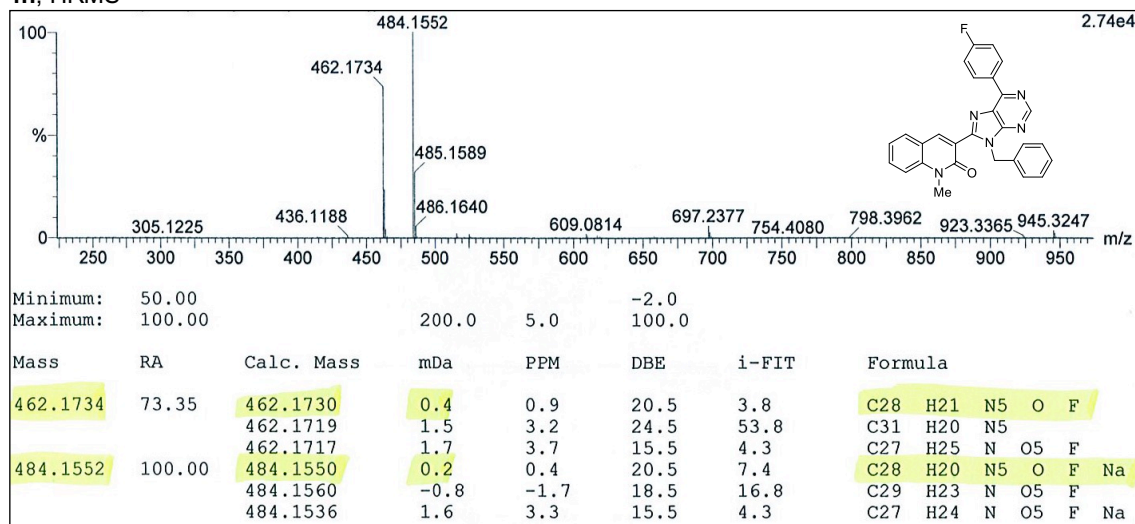

**5a**,  $^1\text{H}$  NMR,  $\text{CDCl}_3$ , 300 MHz

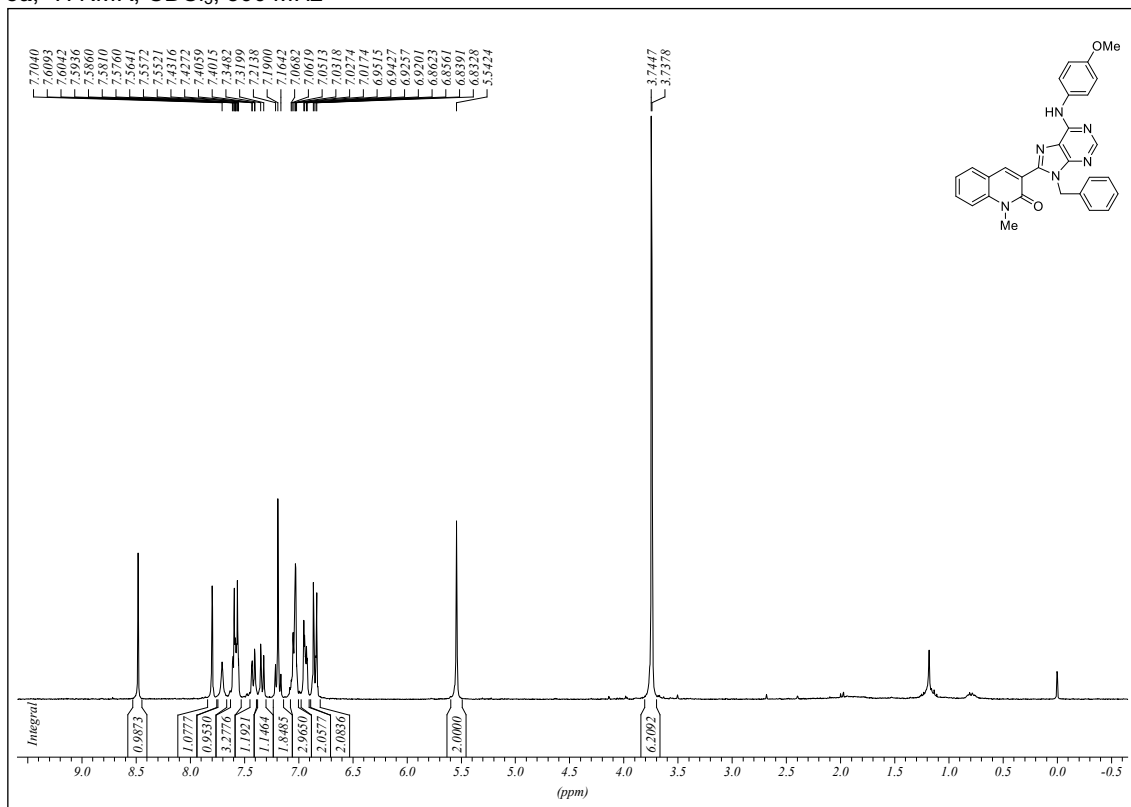

**5a**,  $^{13}\text{C}$ -NMR,  $\text{CDCl}_3$ , 75 MHz

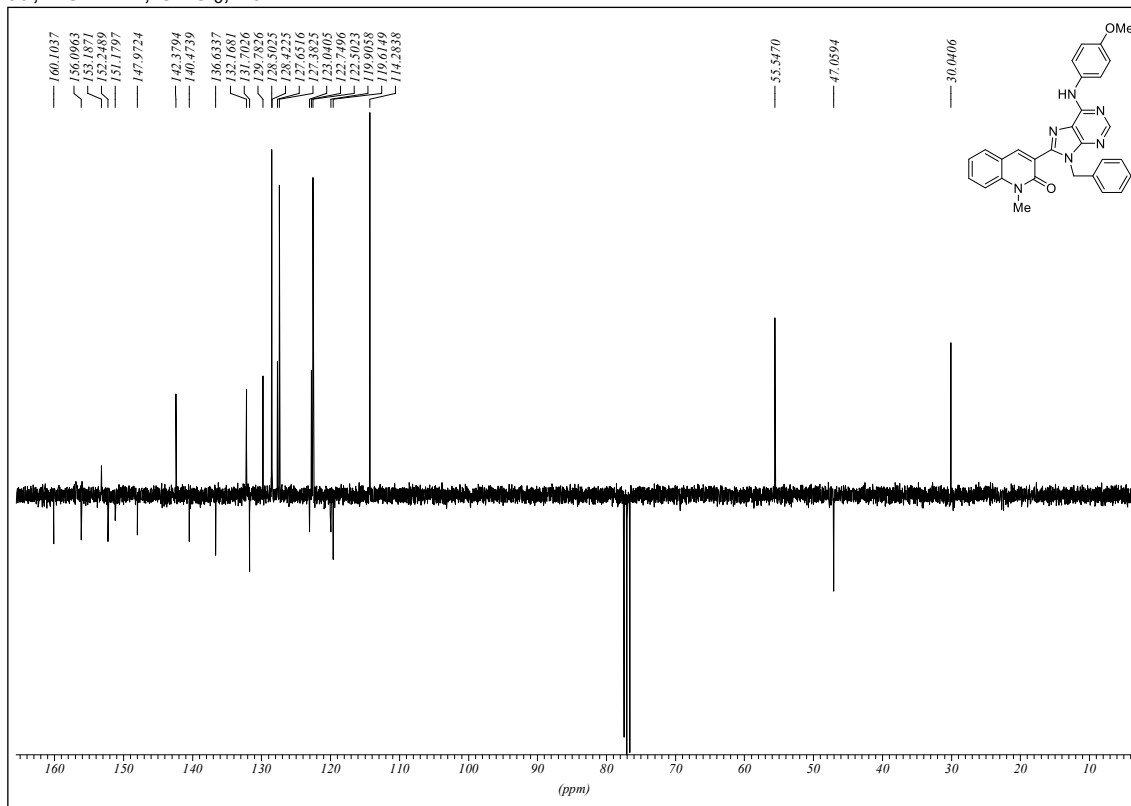

5a-HRMS

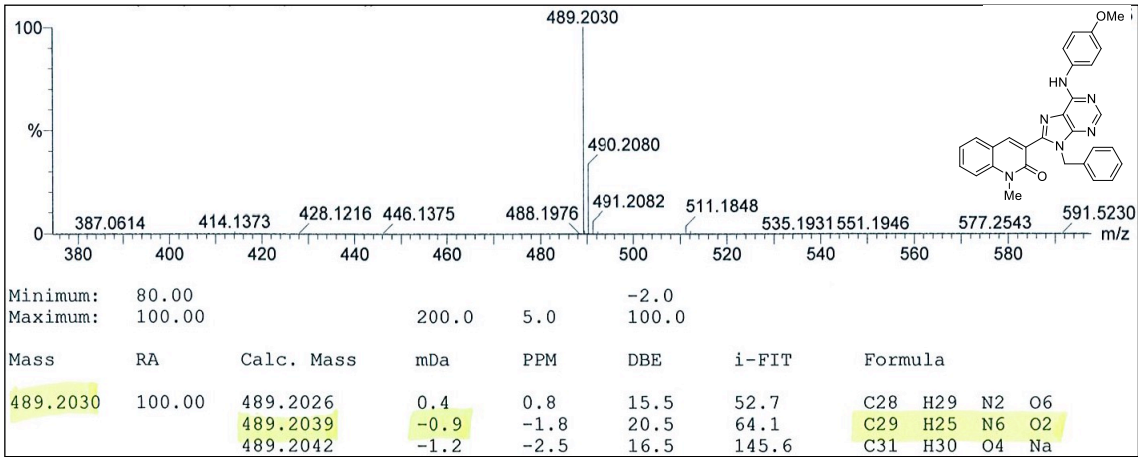

**5b**,  $^1\text{H}$  NMR,  $\text{CDCl}_3$ , 300 MHz

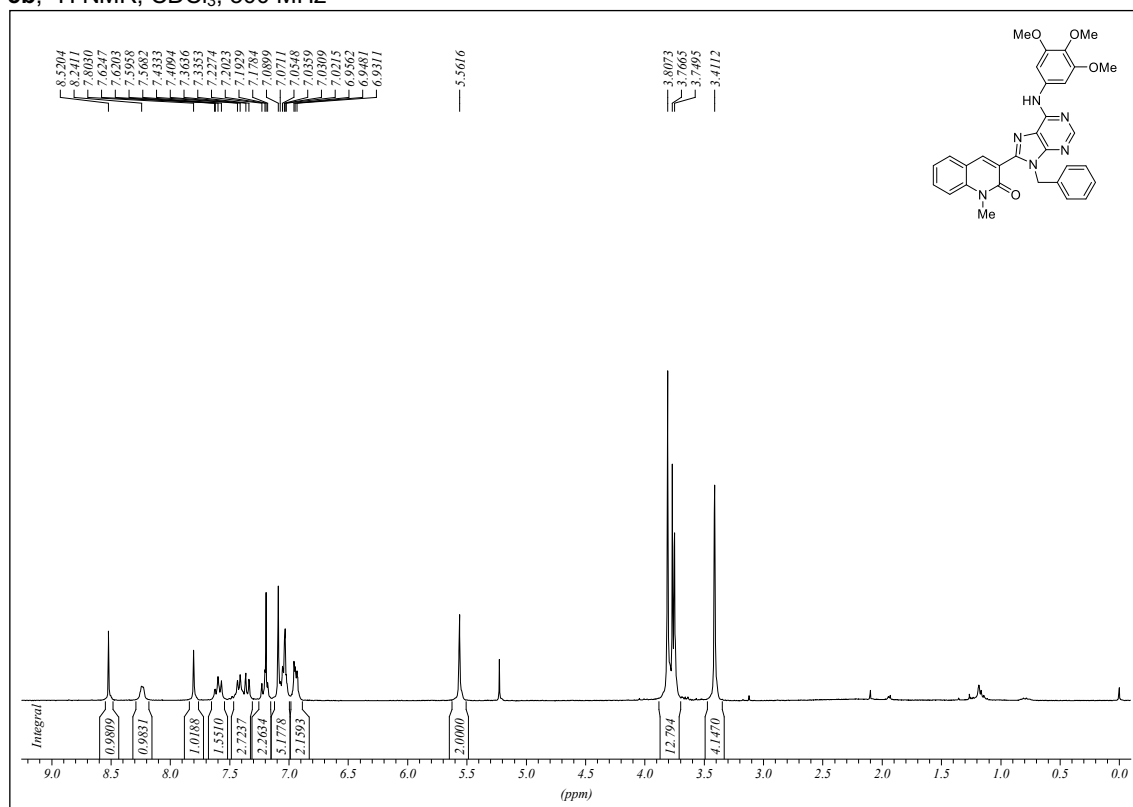

**5b**, JMOD-NMR,  $\text{CDCl}_3$ , 75 MHz

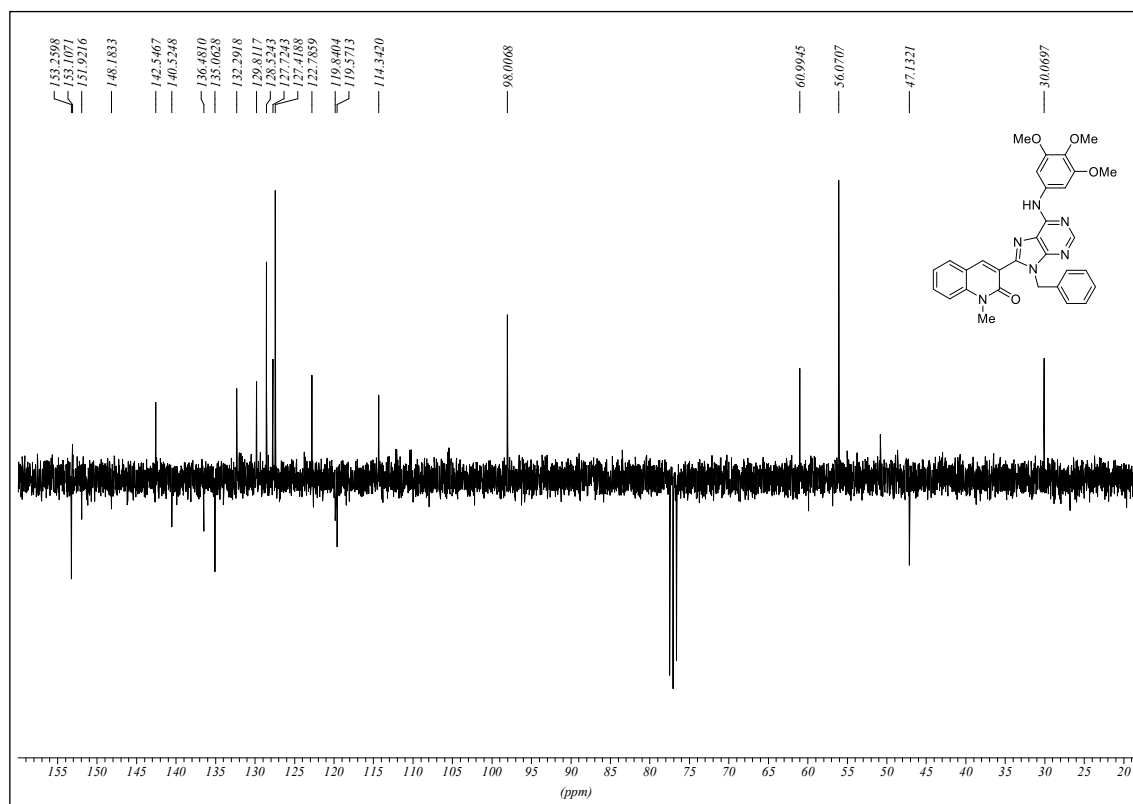

# 5b-HRMS

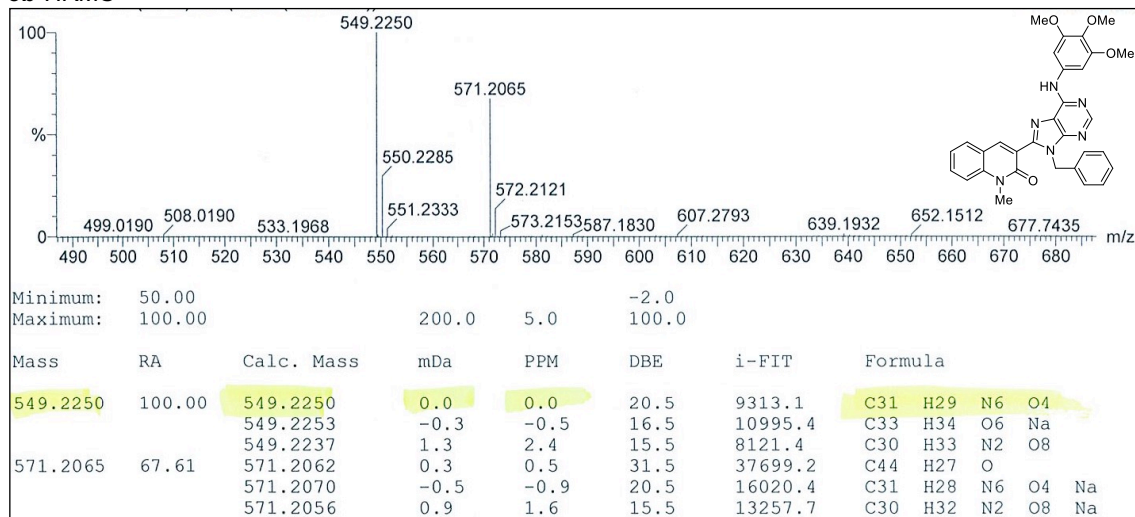

Supplement: s1 [file s1]
